# Supplementary material
Source: PubMed Central journal article supplement (PMC6966029)
Supplement: ijcep0010-11461-f7.pdf [file ijcep0010-11461-f7.pdf]

## miR-124 enhances cell radiosensitivity

**Supplementary Table 1.** Primers for miR-124 and PDCD6 quantification

| Name       | Sequence (5'-3')                                     | Tm (°C) | Amplicon (bp) |
|------------|------------------------------------------------------|---------|---------------|
| miR-124-RT | GTCGTATCCAGTGCAGGGTCCGAGGTATTCGCACTGGATACGACGGCATTCT | 87.8    |               |
| miR-124-F  | GATACTCATAAGGCACGCGG                                 | 60.6    | 64            |
| miR-124-R  | GTGCAGGGTCCGAGGT                                     | 57.9    |               |
| PDCD6-F    | CAGGCGGATGAGAACGTGG                                  | 62.7    | 213           |
| PDCD6-R    | AAAAGCATCAGGATAGTGTGTCC                              | 60.3    |               |
| U6-F       | CGCTTCGGCAGCACATATAAC                                | 59.4    | 60            |
| U6-R       | CAGGGGCCATGCTAATCTT                                  | 57.5    |               |
| GAPDH-F    | GGAGCGAGATCCCTCCAAAT                                 | 61.6    | 197           |
| GAPDH-R    | GGCTGTTGTCATACTTCTCATGG                              | 60.9    |               |
